# Supplementary material
Source: PubMed Central journal article supplement (PMC4990450)
Supplement: NIHMS794070-supplement-Appendices_1_to_8.pdf [file NIHMS794070-supplement-Appendices_1_to_8.pdf]

Appendix 1: Primary codes used for severe sepsis

|                                                                 |                                                                                                           |
|-----------------------------------------------------------------|-----------------------------------------------------------------------------------------------------------|
| Septicemia                                                      | 038.0, 038.10, 038.11, 038.19, 038.2, 038.3, 038.40, 038.41, 038.42, 038.43, 038.44, 038.49, 038.8, 038.9 |
| Bacteremia                                                      | 790.7                                                                                                     |
| Disseminated fungal infection                                   | 117.9                                                                                                     |
| Disseminated candidal infection                                 | 112.5                                                                                                     |
| Candidal endocarditis                                           | 112.81                                                                                                    |
| Fungal endocarditis                                             | 115.04, 115.14, 115.94                                                                                    |
| Salmonella septicemia                                           | 003.1                                                                                                     |
| Septicemic plague                                               | 020.2                                                                                                     |
| Anthrax septicemia                                              | 022.3                                                                                                     |
| Meningococcal septicemia                                        | 036.2                                                                                                     |
| Waterhouse Friedrichson syndrome                                | 036.3                                                                                                     |
| Gonococemia                                                     | 098.89                                                                                                    |
| Sepsis due to indwelling catheter                               | 996.62                                                                                                    |
| SIRS due to infectious process with organ failure=severe sepsis | 995.92                                                                                                    |
| Septic shock                                                    | 785.52                                                                                                    |

Appendix 2 - Classification of acute organ failure

| <b>Organ Failure</b> | <b>ICD-9-CM codes</b> | <b>Description</b>                                                                                                                                                             |
|----------------------|-----------------------|--------------------------------------------------------------------------------------------------------------------------------------------------------------------------------|
| Respiratory          | 518.81                | Acute respiratory failure                                                                                                                                                      |
|                      | 518.82                | Other pulmonary insufficiency, not elsewhere classified<br>includes - Acute respiratory distress<br>Acute respiratory insufficiency<br>Adult respiratory distress syndrome NEC |
|                      | 518.85                | ARDS after shock or trauma                                                                                                                                                     |
|                      | 786.09                | respiratory distress NOS                                                                                                                                                       |
|                      | 791.1                 | Respiratory arrest                                                                                                                                                             |
|                      | 96.7                  | Ventilator management                                                                                                                                                          |
|                      |                       |                                                                                                                                                                                |
| Cardiovascular       |                       |                                                                                                                                                                                |
|                      | 785.5                 | Shock without mention of trauma                                                                                                                                                |
|                      | 785.50                | Shock unspecified                                                                                                                                                              |
|                      | 785.51                | Cardiogenic shock                                                                                                                                                              |
|                      | 785.52                | Septic shock                                                                                                                                                                   |
|                      | 785.59                | Other shock without trauma (includes Hypovolemic Shock)                                                                                                                        |
|                      | 458.8,458.9,796.3     | Hypotension NOS                                                                                                                                                                |
|                      | 00.17                 | Use of vasopressor agent                                                                                                                                                       |
|                      |                       |                                                                                                                                                                                |
| Renal                | 584                   | Acute kidney injury                                                                                                                                                            |
|                      |                       |                                                                                                                                                                                |
| Hepatic              | 570                   | Acute hepatic failure or necrosis                                                                                                                                              |
|                      | 572.2                 | Hepatic encephalopathy                                                                                                                                                         |
|                      | 573.4                 | Hepatic infarction                                                                                                                                                             |
|                      |                       |                                                                                                                                                                                |
| Hematologic          | 286.6                 | Defibrination syndrome                                                                                                                                                         |
|                      | 286.7                 | Acquired coagulation factor deficiency                                                                                                                                         |
|                      | 286.9                 | Coagulopathy = "Other and unspecified coagulation defects"                                                                                                                     |
|                      | 287.4, 287.5          | Thrombocytopenia - secondary or unspecified                                                                                                                                    |
|                      |                       |                                                                                                                                                                                |
| Metabolic            | 276.2                 | Acidosis - metabolic or lactic                                                                                                                                                 |
|                      |                       |                                                                                                                                                                                |
| Neurologic           | 293                   | Transient organic psychosis                                                                                                                                                    |
|                      | 348.1                 | Anoxic brain injury                                                                                                                                                            |
|                      | 348.3                 | Acute encephalopathy                                                                                                                                                           |
|                      | 780.01                | Coma                                                                                                                                                                           |
|                      | 780.09                | Altered consciousness - unspecified                                                                                                                                            |
|                      | 89.14                 | EEG                                                                                                                                                                            |

Appendix 3: Patient co-morbidities & procedures

| <b>Excluded ESRD &amp; transplant patients</b>                                                            |                                                                                                                                                                                           |
|-----------------------------------------------------------------------------------------------------------|-------------------------------------------------------------------------------------------------------------------------------------------------------------------------------------------|
| <i>End Stage Renal Disease</i>                                                                            | <i>585.6 (585 before 2005), 39.95, V56.0-3, V45.1x, V56.2, V56.8</i>                                                                                                                      |
| <i>Transplants</i>                                                                                        | <i>Kidney: V42.0, 996.81,<br/>Heart: V42.1, 996.83,<br/>Lungs: V42.6, 996.84,<br/>Liver: V42.7, 996.82<br/>Stem cell: V42.82<br/>BMT V42.81, 996.85<br/>Others: V42.84, V42.89, V42.9</i> |
| <b>Co-morbidities used in Charlson-Deyo's index</b>                                                       |                                                                                                                                                                                           |
| Coronary artery disease                                                                                   | 410-414                                                                                                                                                                                   |
| Congestive Heart Failure                                                                                  | 428                                                                                                                                                                                       |
| Stroke                                                                                                    | 431-437                                                                                                                                                                                   |
| Chronic Pulmonary Disease<br>(COPD, asthma, ILD,<br>bronchiectasis)                                       | 490- 496,500-505                                                                                                                                                                          |
| Cirrhosis                                                                                                 | 571.2,571.5-9, 275.0, 275.1, 39.1, 572.4, 572.2, 456.2, 567.23                                                                                                                            |
| Peripheral vascular disease                                                                               | 440,441,785.4,443.1,443.9                                                                                                                                                                 |
| Diabetes Mellitus                                                                                         | 250.xx                                                                                                                                                                                    |
| Chronic kidney disease                                                                                    | 585.1-585.5,585.9                                                                                                                                                                         |
| Cancer without metastasis                                                                                 | 140-175, 179-195                                                                                                                                                                          |
| Cancer with metastasis                                                                                    | 196-199                                                                                                                                                                                   |
| Lymphoma and leukemia                                                                                     | 200-208                                                                                                                                                                                   |
| Human Immunodeficiency Virus                                                                              | 042, 079.53, V08                                                                                                                                                                          |
| Rheumatologic and Collagen<br>vascular diseases                                                           | 710,714,720                                                                                                                                                                               |
| Paralysis                                                                                                 | 342,344                                                                                                                                                                                   |
| <b>Co-morbidities associated with outcomes in severe sepsis but not included in Charlson-Deyo's index</b> |                                                                                                                                                                                           |
| Atrial fibrillation                                                                                       | 427.31                                                                                                                                                                                    |
| Morbid obesity                                                                                            | 278.01, V85.4                                                                                                                                                                             |
| Immunodeficiency                                                                                          | 279                                                                                                                                                                                       |
| Malnutrition                                                                                              | 260-269                                                                                                                                                                                   |
| <b>Procedures</b>                                                                                         |                                                                                                                                                                                           |
| Mechanical ventilation                                                                                    | 96.70-2                                                                                                                                                                                   |
| Blood transfusion                                                                                         | 99.03, 99.04                                                                                                                                                                              |
| Swan Ganz catheterization                                                                                 | 37.21                                                                                                                                                                                     |
| Central line placement                                                                                    | 38.93, 89.62                                                                                                                                                                              |
| Tracheostomy                                                                                              | 31.1, 31.2,31.21,31.29                                                                                                                                                                    |
| Total parenteral nutrition                                                                                | 99.15                                                                                                                                                                                     |
| New dialysis                                                                                              | Acute kidney injury & hemodialysis                                                                                                                                                        |
| Hemodialysis                                                                                              | 39.95                                                                                                                                                                                     |
| Acute kidney injury                                                                                       | 584.5-584.9                                                                                                                                                                               |

Appendix 4: Predictors of mortality in severe sepsis using multivariate logistic regression analysis

| Variables         | Odds ratio ( 95% Confidence interval) |
|-------------------|---------------------------------------|
| Uninsured         | Reference                             |
| Private           |                                       |
| Organ failures: 1 | 0.75 (0.70-0.80)                      |
| 2                 | 0.71 (0.67-0.76)                      |
| 3                 | 0.61 (0.56-0.67)                      |
| 4                 | 0.62 (0.55-0.71)                      |
| 5                 | 0.54 (0.43-0.68)                      |
| 6                 | 0.33 (0.18-0.61)                      |
| Medicare          |                                       |
| Organ failures: 1 | 1.00 (0.93-1.07)                      |
| 2                 | 0.82 (0.77-0.89)                      |
| 3                 | 0.71 (0.65-0.77)                      |
| 4                 | 0.71 (0.61-0.81)                      |
| 5                 | 0.55 (0.42-0.71)                      |
| 6                 | 0.55 (0.28-1.08)                      |
| Medicaid          |                                       |
| Organ failures: 1 | 0.89 (0.83-0.96)                      |
| 2                 | 0.82 (0.76-0.88)                      |
| 3                 | 0.74 (0.68-0.81)                      |
| 4                 | 0.76 (0.66-0.87)                      |
| 5                 | 0.67 (0.53-0.86)                      |
| 6                 | 0.51 (0.27-0.95)                      |
| Others            |                                       |
| Organ failures: 1 | 0.81 (0.73-0.89)                      |
| 2                 | 0.78 (0.71-0.86)                      |
| 3                 | 0.64 (0.56-0.72)                      |
| 4                 | 0.74 (0.62-0.89)                      |
| 5                 | 0.59 (0.43-0.82)                      |
| 6                 | 1.37 (0.52-3.58)                      |
|                   |                                       |
|                   |                                       |
|                   |                                       |
|                   |                                       |
| Age category      |                                       |
| 18-24             | Reference                             |
| 25-34             | 1.14(1.05-1.23)                       |
| 35-44             | 1.27(1.18-1.37)                       |
| 45-54             | 1.42(1.31-1.55)                       |
| 55-64             | 1.68(1.51-1.85)                       |
| Sex               |                                       |
| Male              | Reference                             |
| Female            | 0.96(0.93-0.98)                       |
| Race              |                                       |
| Whites            | Reference                             |
| Blacks            | 1.13(1.09-1.18)                       |
| Hispanics         | 1.09(1.04-1.15)                       |

|                                 |                 |
|---------------------------------|-----------------|
| Asians                          | 1.02(0.94-1.12) |
| Native Americans                | 1.04(0.89-1.23) |
| Others                          | 1.07(0.99-1.15) |
| Unknown                         | 1.03(0.97-1.09) |
| Annual Zip income               |                 |
| 1-38,999                        | Reference       |
| 39,000-47,999                   | 0.92(0.89-0.96) |
| 48,000-62,999                   | 0.86(0.82-0.90) |
| ≥63,000                         | 0.84(0.80-0.88) |
| Admission source , (%)          |                 |
| From emergency room             | reference       |
| Transfer from other hospitals   | 1.06(0.99-1.14) |
| From nursing homes              | 1.00(0.91-1.09) |
| Law/Others                      | 1.30(0.88-1.91) |
| Hospital Characteristics, (%)   |                 |
| Non-Teaching                    | Reference       |
| Teaching                        | 1.06(1.01-1.11) |
|                                 |                 |
| Small                           | Reference       |
| Medium                          | 1.06(1.00-1.13) |
| Large                           | 1.07(1.01-1.14) |
| Hospital ownership, (%)         |                 |
| Government - Non federal        | Reference       |
| Private - Non Profit            | 0.91(0.85-0.97) |
| Private - Investor owned        | 0.95(0.88-1.03) |
| Number of Organ System Failures |                 |
| One                             | Reference       |
| Two                             | 2.28(2.09-2.49) |
| Three                           | 4.39(3.95-4.88) |
| Four                            | 6.28(5.50-7.1)  |
| Five                            | 10.3(8.33-12.9) |
| Six/Seven                       | 16.2(9.34-28.2) |
| Co-morbidities                  |                 |
| Coronary Artery Disease         | 1.15(1.11-1.19) |
| Congestive heart failure        | 1.06(1.03-1.10) |
| Atrial fibrillation             | 1.25(1.20-1.30) |
| Diabetes mellitus               | 0.81(0.79-0.84) |
| BMI≥40                          | 0.94(0.89-1.01) |
| Peripheral vascular disease     | 1.34(1.27-1.41) |
| Stroke                          | 1.75(1.66-1.85) |
| Paralysis                       | 0.79(0.74-0.84) |
| Chronic lung disease            | 0.95(0.92-0.97) |
| Cirrhosis                       | 2.29(2.21-2.37) |
| Chronic Kidney Disease          | 0.98(0.93-1.03) |
| HIV infection                   | 2.25(2.13-2.38) |
| Rheumatologic and Collagen      | 1.34(1.26-1.42) |

|                                 |                 |
|---------------------------------|-----------------|
| vascular diseases               |                 |
| Immunodeficiency                | 0.94(0.75-1.17) |
| Malnutrition                    | 0.93(0.89-0.97) |
| Cancer without metastasis       | 1.92(1.83-2.01) |
| Cancer with metastasis          | 3.37(3.21-3.54) |
| Lymphoma and leukemia           | 2.93(2.77-3.09) |
| Year                            |                 |
| 2000                            | Reference       |
| 2001                            | 0.90(0.84-0.96) |
| 2002                            | 0.82(0.76-0.87) |
| 2003                            | 0.74(0.69-0.79) |
| 2004                            | 0.66(0.61-0.71) |
| 2005                            | 0.60(0.56-0.64) |
| 2006                            | 0.52(0.49-0.56) |
| 2007                            | 0.44(0.41-0.47) |
| 2008                            | 0.41(0.38-0.45) |
| Procedures (%)                  |                 |
| Invasive mechanical ventilation | 3.01(2.92-3.11) |
| Blood transfusions              | 0.93(0.90-0.96) |
| Tracheostomy                    | 0.58(0.55-0.61) |
| Central venous catheter         | 0.89(0.87-0.91) |
| Swan-Ganz catheter              | 1.47(1.21-1.79) |
| Total parenteral nutrition      | 0.97(0.92-1.01) |
| New Dialysis                    | 1.22(1.17-1.28) |

\* Significant at  $p < 0.05$

Appendix 5: Mortality rates in severe sepsis between ages 18 – 64 years, 2000-2008. Bars represent standard error of the mean.

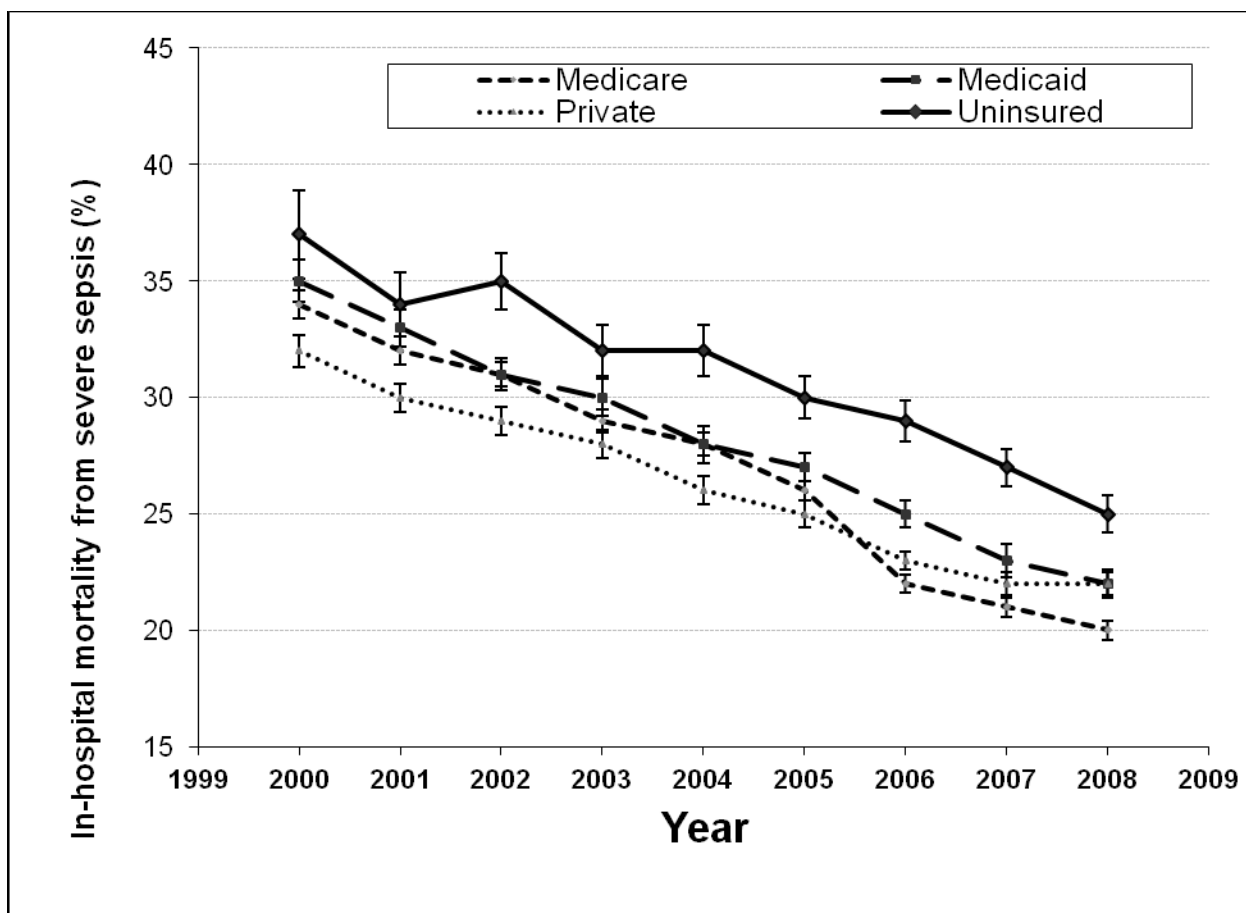

Appendix 6. Forrest plot showing adjusted odds ratio of undergoing procedure\*. Comparison of private vs. uninsured. Model adjusted for age, gender, race, severity of sepsis, Charlson-Deyo's co-morbid index, teaching hospital and hospital ownership.

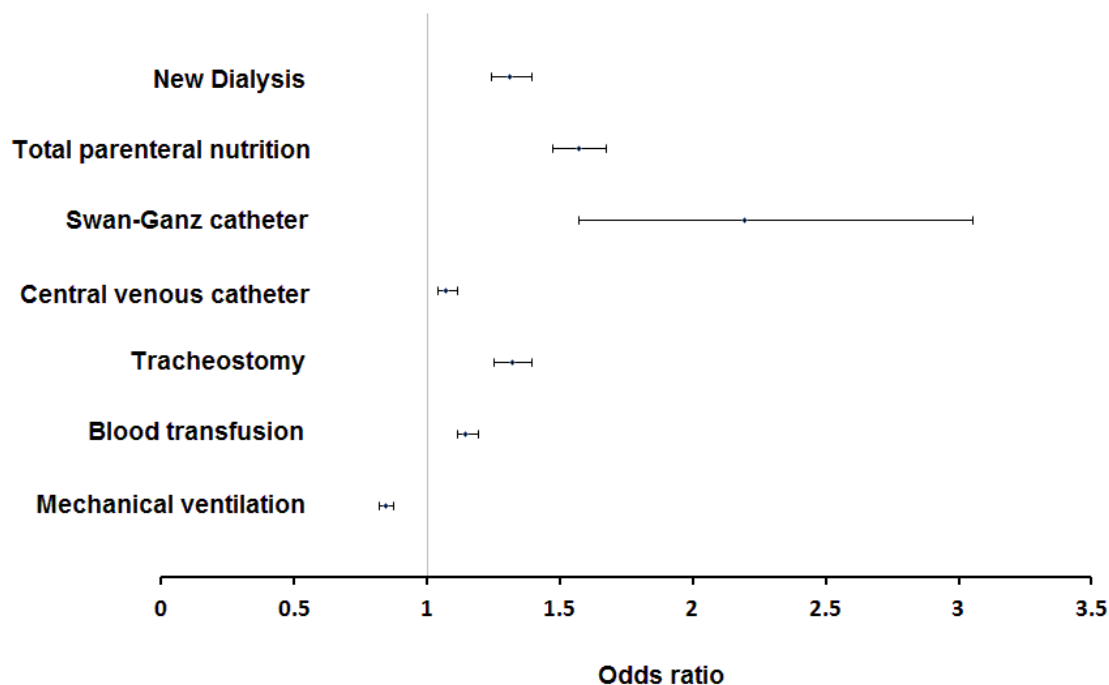

\*

Appendix 7: Adjusted difference in length of stay and odds of being discharged to nursing home or with home care^.

| Variables    | Adjusted relative increase in length of stay ( 95% CI) | Adjusted odds of being discharged to nursing home ( 95% CI) | Adjusted odds of being discharged with home care ( 95% CI) |
|--------------|--------------------------------------------------------|-------------------------------------------------------------|------------------------------------------------------------|
| <b>Payer</b> |                                                        |                                                             |                                                            |
| Uninsured    | Reference                                              | Reference                                                   | Reference                                                  |
| Private*     | 1.05(1.03-1.08)                                        | 2.06(1.97-2.16)                                             | 2.64(2.50-2.78)                                            |
| Medicare*    | 1.05(1.03-1.08)                                        | 5.31(5.06-5.56)                                             | 3.31(3.13-3.51)                                            |
| Medicaid*    | 1.19(1.17-1.21)                                        | 3.81(3.64-4.00)                                             | 2.54(2.40-2.69)                                            |
| Others*      | 1.10(1.08-1.15)                                        | 1.61(1.51-1.71)                                             | 1.51(1.41-1.63)                                            |

^ The regression was adjusted for age, gender, race, Charlson-Deyo's index and number of organ dysfunction.

\* p<0.05



Appendix 8: ROC curve for the model D

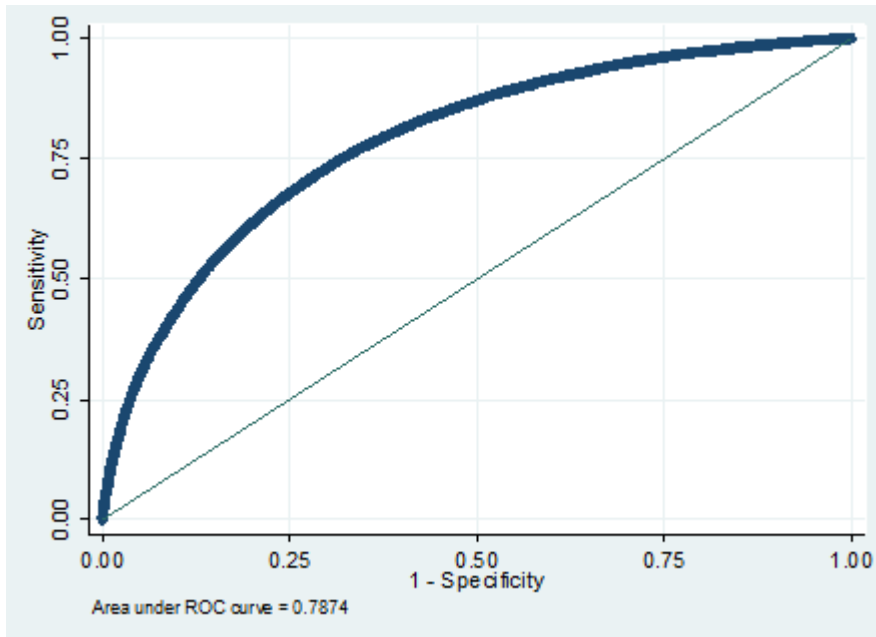

**Goodness of fit**

**chi square/df = 1.11**

**estat gof , table group (500)**

Logistic model for died, goodness-of-fit test  
 number of observations = 260365  
 number of groups = 500  
 Hosmer-Lemeshow chi2(498) = 551.06  
 Prob > chi2 = 0.0499

**Collinearity Diagnostics**

**\_Ipay1\_1 : 1= PRIVATE, 0 = EVERYTHING ELSE**  
**\_Ipay1\_2 : 1= MEDICARE, 0 = EVERYTHING ELSE**  
**\_Ipay1\_3 : 1= MEDICAID, 0 = EVERYTHING ELSE**  
**\_Ipay1\_5 : 1= OTHERS, 0 = EVERYTHING ELSE**

| Variable    | SQRT<br>VIF | VIF  | R-<br>Tolerance | Squared |
|-------------|-------------|------|-----------------|---------|
| -----       |             |      |                 |         |
| _Ipay1_1    | 1.12        | 1.06 | 0.8955          | 0.1045  |
| agegroup    | 1.15        | 1.07 | 0.8708          | 0.1292  |
| sex         | 1.04        | 1.02 | 0.9584          | 0.0416  |
| race        | 1.03        | 1.02 | 0.9676          | 0.0324  |
| zipinc_qrtl | 1.11        | 1.05 | 0.9029          | 0.0971  |

|              |      |      |        |        |
|--------------|------|------|--------|--------|
| asource      | 1.04 | 1.02 | 0.9658 | 0.0342 |
| hosp_teach   | 1.10 | 1.05 | 0.9100 | 0.0900 |
| h_contrl     | 1.09 | 1.04 | 0.9164 | 0.0836 |
| hosp_bedsiz  | 1.03 | 1.01 | 0.9726 | 0.0274 |
| year         | 1.10 | 1.05 | 0.9087 | 0.0913 |
| ORGAN_DYSFN  | 1.34 | 1.16 | 0.7454 | 0.2546 |
| cad          | 1.09 | 1.05 | 0.9142 | 0.0858 |
| chf          | 1.12 | 1.06 | 0.8913 | 0.1087 |
| stroke       | 1.03 | 1.01 | 0.9735 | 0.0265 |
| chr_lung_dz  | 1.10 | 1.05 | 0.9116 | 0.0884 |
| cirrhosis    | 1.07 | 1.04 | 0.9324 | 0.0676 |
| dm           | 1.09 | 1.04 | 0.9187 | 0.0813 |
| pvd          | 1.03 | 1.01 | 0.9743 | 0.0257 |
| mobese       | 1.03 | 1.01 | 0.9749 | 0.0251 |
| ckd          | 1.04 | 1.02 | 0.9624 | 0.0376 |
| solid_cancer | 1.48 | 1.22 | 0.6748 | 0.3252 |
| mets         | 1.49 | 1.22 | 0.6727 | 0.3273 |
| blood_cancer | 1.05 | 1.03 | 0.9484 | 0.0516 |
| hiv          | 1.06 | 1.03 | 0.9448 | 0.0552 |
| col_vd       | 1.02 | 1.01 | 0.9795 | 0.0205 |
| paralysis    | 1.04 | 1.02 | 0.9605 | 0.0395 |
| afib         | 1.06 | 1.03 | 0.9474 | 0.0526 |
| immunodef    | 1.00 | 1.00 | 0.9977 | 0.0023 |
| malnutrition | 1.04 | 1.02 | 0.9623 | 0.0377 |
| mech_vent    | 1.36 | 1.17 | 0.7365 | 0.2635 |
| trach        | 1.09 | 1.04 | 0.9170 | 0.0830 |
| cvp          | 1.08 | 1.04 | 0.9228 | 0.0772 |
| rhc          | 1.01 | 1.00 | 0.9925 | 0.0075 |
| blood        | 1.07 | 1.04 | 0.9307 | 0.0693 |
| tpn          | 1.06 | 1.03 | 0.9397 | 0.0603 |
| new_dialysis | 1.09 | 1.04 | 0.9204 | 0.0796 |

-----  
Mean VIF 1.10

| Variable    | SQRT<br>VIF | VIF  | R-<br>Tolerance | Squared |
|-------------|-------------|------|-----------------|---------|
| -----       |             |      |                 |         |
| _Ipay1_2    | 1.06        | 1.03 | 0.9398          | 0.0602  |
| agegroup    | 1.16        | 1.08 | 0.8586          | 0.1414  |
| sex         | 1.04        | 1.02 | 0.9579          | 0.0421  |
| race        | 1.03        | 1.02 | 0.9674          | 0.0326  |
| zipinc_qrtl | 1.06        | 1.03 | 0.9438          | 0.0562  |
| asource     | 1.03        | 1.01 | 0.9708          | 0.0292  |
| hosp_teach  | 1.10        | 1.05 | 0.9094          | 0.0906  |
| h_contrl    | 1.09        | 1.04 | 0.9186          | 0.0814  |
| hosp_bedsiz | 1.03        | 1.01 | 0.9729          | 0.0271  |
| year        | 1.10        | 1.05 | 0.9087          | 0.0913  |
| ORGAN_DYSFN | 1.34        | 1.16 | 0.7452          | 0.2548  |
| cad         | 1.09        | 1.05 | 0.9143          | 0.0857  |
| chf         | 1.12        | 1.06 | 0.8906          | 0.1094  |

|              |      |      |        |        |
|--------------|------|------|--------|--------|
| stroke       | 1.03 | 1.01 | 0.9728 | 0.0272 |
| chr_lung_dz  | 1.10 | 1.05 | 0.9123 | 0.0877 |
| cirrhosis    | 1.07 | 1.04 | 0.9320 | 0.0680 |
| dm           | 1.09 | 1.04 | 0.9191 | 0.0809 |
| pvd          | 1.03 | 1.01 | 0.9743 | 0.0257 |
| mobese       | 1.03 | 1.01 | 0.9750 | 0.0250 |
| ckd          | 1.04 | 1.02 | 0.9617 | 0.0383 |
| solid_cancer | 1.48 | 1.22 | 0.6745 | 0.3255 |
| mets         | 1.48 | 1.22 | 0.6737 | 0.3263 |
| blood_cancer | 1.05 | 1.03 | 0.9514 | 0.0486 |
| hiv          | 1.05 | 1.03 | 0.9493 | 0.0507 |
| col_vd       | 1.02 | 1.01 | 0.9789 | 0.0211 |
| paralysis    | 1.04 | 1.02 | 0.9585 | 0.0415 |
| afib         | 1.06 | 1.03 | 0.9476 | 0.0524 |
| immunodef    | 1.00 | 1.00 | 0.9978 | 0.0022 |
| malnutrition | 1.04 | 1.02 | 0.9624 | 0.0376 |
| mech_vent    | 1.36 | 1.17 | 0.7368 | 0.2632 |
| trach        | 1.09 | 1.04 | 0.9170 | 0.0830 |
| cvp          | 1.08 | 1.04 | 0.9227 | 0.0773 |
| rhc          | 1.01 | 1.00 | 0.9925 | 0.0075 |
| blood        | 1.07 | 1.04 | 0.9309 | 0.0691 |
| tpn          | 1.06 | 1.03 | 0.9408 | 0.0592 |
| new_dialysis | 1.09 | 1.04 | 0.9204 | 0.0796 |

-----  
Mean VIF 1.10

| Variable     | SQRT<br>VIF | VIF  | R-<br>Tolerance | Squared |
|--------------|-------------|------|-----------------|---------|
| -----        |             |      |                 |         |
| _Ipay1_3     | 1.07        | 1.03 | 0.9354          | 0.0646  |
| agegroup     | 1.16        | 1.08 | 0.8594          | 0.1406  |
| sex          | 1.05        | 1.02 | 0.9553          | 0.0447  |
| race         | 1.03        | 1.02 | 0.9672          | 0.0328  |
| zipinc_qrtl  | 1.08        | 1.04 | 0.9270          | 0.0730  |
| asource      | 1.03        | 1.02 | 0.9690          | 0.0310  |
| hosp_teach   | 1.10        | 1.05 | 0.9099          | 0.0901  |
| h_contrl     | 1.09        | 1.04 | 0.9184          | 0.0816  |
| hosp_bedsize | 1.03        | 1.01 | 0.9731          | 0.0269  |
| year         | 1.10        | 1.05 | 0.9084          | 0.0916  |
| ORGAN_DYSFN  | 1.34        | 1.16 | 0.7454          | 0.2546  |
| cad          | 1.09        | 1.05 | 0.9143          | 0.0857  |
| chf          | 1.12        | 1.06 | 0.8921          | 0.1079  |
| stroke       | 1.03        | 1.01 | 0.9736          | 0.0264  |
| chr_lung_dz  | 1.09        | 1.05 | 0.9157          | 0.0843  |
| cirrhosis    | 1.07        | 1.04 | 0.9305          | 0.0695  |
| dm           | 1.09        | 1.04 | 0.9189          | 0.0811  |
| pvd          | 1.03        | 1.01 | 0.9744          | 0.0256  |
| mobese       | 1.03        | 1.01 | 0.9750          | 0.0250  |
| ckd          | 1.04        | 1.02 | 0.9628          | 0.0372  |
| solid_cancer | 1.48        | 1.22 | 0.6754          | 0.3246  |
| mets         | 1.48        | 1.22 | 0.6745          | 0.3255  |

|              |      |      |        |        |
|--------------|------|------|--------|--------|
| blood_cancer | 1.05 | 1.02 | 0.9530 | 0.0470 |
| hiv          | 1.06 | 1.03 | 0.9437 | 0.0563 |
| col_vd       | 1.02 | 1.01 | 0.9792 | 0.0208 |
| paralysis    | 1.04 | 1.02 | 0.9633 | 0.0367 |
| afib         | 1.06 | 1.03 | 0.9475 | 0.0525 |
| immunodef    | 1.00 | 1.00 | 0.9977 | 0.0023 |
| malnutrition | 1.04 | 1.02 | 0.9623 | 0.0377 |
| mech_vent    | 1.36 | 1.17 | 0.7366 | 0.2634 |
| trach        | 1.09 | 1.04 | 0.9172 | 0.0828 |
| cvp          | 1.08 | 1.04 | 0.9230 | 0.0770 |
| rhc          | 1.01 | 1.00 | 0.9925 | 0.0075 |
| blood        | 1.08 | 1.04 | 0.9301 | 0.0699 |
| tpn          | 1.06 | 1.03 | 0.9406 | 0.0594 |
| new_dialysis | 1.09 | 1.04 | 0.9204 | 0.0796 |

-----  
Mean VIF 1.10

| Variable      | SQRT |      | R-        |         |
|---------------|------|------|-----------|---------|
|               | VIF  | VIF  | Tolerance | Squared |
| -----         |      |      |           |         |
| _Ipay1_5      | 1.01 | 1.00 | 0.9904    | 0.0096  |
| agegroup      | 1.15 | 1.07 | 0.8729    | 0.1271  |
| sex           | 1.05 | 1.02 | 0.9566    | 0.0434  |
| race          | 1.03 | 1.02 | 0.9676    | 0.0324  |
| zipinc_qrtl   | 1.06 | 1.03 | 0.9462    | 0.0538  |
| asource       | 1.03 | 1.01 | 0.9708    | 0.0292  |
| hosp_teach    | 1.10 | 1.05 | 0.9106    | 0.0894  |
| h_contrl      | 1.09 | 1.04 | 0.9171    | 0.0829  |
| hosp_bedsizes | 1.03 | 1.01 | 0.9731    | 0.0269  |
| year          | 1.10 | 1.05 | 0.9081    | 0.0919  |
| ORGAN_DYSFN   | 1.34 | 1.16 | 0.7454    | 0.2546  |
| cad           | 1.09 | 1.05 | 0.9143    | 0.0857  |
| chf           | 1.12 | 1.06 | 0.8920    | 0.1080  |
| stroke        | 1.03 | 1.01 | 0.9736    | 0.0264  |
| chr_lung_dz   | 1.09 | 1.04 | 0.9168    | 0.0832  |
| cirrhosis     | 1.07 | 1.04 | 0.9331    | 0.0669  |
| dm            | 1.09 | 1.04 | 0.9194    | 0.0806  |
| pvd           | 1.03 | 1.01 | 0.9744    | 0.0256  |
| mobese        | 1.03 | 1.01 | 0.9749    | 0.0251  |
| ckd           | 1.04 | 1.02 | 0.9628    | 0.0372  |
| solid_cancer  | 1.48 | 1.22 | 0.6755    | 0.3245  |
| mets          | 1.48 | 1.22 | 0.6745    | 0.3255  |
| blood_cancer  | 1.05 | 1.02 | 0.9529    | 0.0471  |
| hiv           | 1.05 | 1.03 | 0.9494    | 0.0506  |
| col_vd        | 1.02 | 1.01 | 0.9795    | 0.0205  |
| paralysis     | 1.04 | 1.02 | 0.9638    | 0.0362  |
| afib          | 1.06 | 1.03 | 0.9476    | 0.0524  |
| immunodef     | 1.00 | 1.00 | 0.9978    | 0.0022  |
| malnutrition  | 1.04 | 1.02 | 0.9624    | 0.0376  |
| mech_vent     | 1.36 | 1.16 | 0.7368    | 0.2632  |
| trach         | 1.09 | 1.04 | 0.9173    | 0.0827  |

|              |      |      |        |        |
|--------------|------|------|--------|--------|
| cvp          | 1.08 | 1.04 | 0.9230 | 0.0770 |
| rhc          | 1.01 | 1.00 | 0.9925 | 0.0075 |
| blood        | 1.07 | 1.04 | 0.9309 | 0.0691 |
| tpn          | 1.06 | 1.03 | 0.9409 | 0.0591 |
| new_dialysis | 1.09 | 1.04 | 0.9204 | 0.0796 |

---

Mean VIF 1.10
